1 **Underestimation of SARS-CoV-2 in wastewater due to single or double**  
2 **mutations in the N1 qPCR probe binding region**

3

4 Jianxian Sun<sup>1#</sup>, Minqing Ivy Yang<sup>2#</sup>, Jiayi Peng<sup>1</sup>, Ismail Khan<sup>1,2</sup>, Jhoselyn Jaramillo Lopez<sup>1,2</sup>,  
5 Ronny Chan<sup>1,2</sup>, Elizabeth Edwards<sup>2\*</sup>, Hui Peng<sup>1,3</sup>

6

7 <sup>1</sup> Department of Chemistry, University of Toronto, 80 St George Street, Toronto, ON, M5S 3H6,  
8 Canada

9 <sup>2</sup> Department of Chemical Engineering and Applied Chemistry, University of Toronto, Toronto,  
10 ON, M5S 3E5, Canada

11 <sup>3</sup> School of the Environment, University of Toronto, 80 St George Street, Toronto, ON, M5S  
12 3H6, Canada

13

14

15 **\*Corresponding authors:** Dr. Elizabeth Edwards, Email: [elizabeth.edwards@utoronto.ca](mailto:elizabeth.edwards@utoronto.ca),  
16 Department of Chemical Engineering and Applied Chemistry, University of Toronto, Toronto, ON,  
17 M5S 3E5, Canada.

18 <sup>#</sup> These authors contributed equally to this paper

19 **Abstract**

20 Wastewater surveillance using RT-qPCR has now been widely adopted to track circulating levels  
21 of SARS-CoV-2 virus in many sewer sheds. The CDC qPCR assays targeting two regions (N1  
22 and N2) within the N gene are commonly used, but a discrepancy between the two biomarkers  
23 has been noticed by many groups using this method since late 2021. The reason is presumed to  
24 be due to mutations in regions targeted by the qPCR probe. In this study, we systematically  
25 investigated and unequivocally confirmed that the underlying reason for this discrepancy was  
26 mutations in the N1 probe target, and that a single mutation could cause a significant drop in  
27 signal. We first confirmed the proportion of related mutations in wastewater samples (Jan 2021-  
28 Dec 2022) using nested PCR and LC-MS. Based on relative proportion of N1 alleles, we  
29 separated the wastewater data into four time periods corresponding to different variant waves:  
30 Period I (Alpha and Delta waves with 0 mutation), Period II (BA.1/BA.2 wave with a single  
31 mutation found in all Omicron strains), Period III (BA. 5.2\* wave with two mutations), and  
32 Period IV (BQ.1\* wave with two mutations). Significantly lower N1 copies relative to N2  
33 copies in samples from Periods II-IV compared to those from Period I was observed in  
34 wastewater. To further pinpoint the extent to which each mutation impacted N1 quantification,  
35 we compared the qPCR response among different synthetic oligomers with corresponding  
36 mutations. This study highlighted the impact of even just one or two mutations on qPCR-based  
37 wastewater surveillance of SARS-CoV-2.

38 **Keywords:** SARS-CoV-2; Wastewater surveillance; RT-qPCR; mutations; N1 dropout

39

## 40 **1. Introduction**

41 The outbreak of a novel coronavirus pneumonia (COVID-19) led to over 4.77 million positive  
42 cases and 54,498 deaths in Canada by October 24, 2023(Government-of-Canada 2023). Due to  
43 the high cost and limited capacity associated with nasopharyngeal swab testing, most countries  
44 including Canada discontinued population-wide clinical polymerase chain reaction (PCR) testing  
45 in 2022. Wastewater-based epidemiology (WBE) has now become the primary method to assess  
46 population-level trend of SARS-CoV-2 (Kirby et al. 2021, Peccia et al. 2020, Zheng et al. 2022).  
47 Compared to testing individuals using nasopharyngeal swab PCR, WBE proves to be a cost-  
48 effective population-level solution, offering early warning information ahead of clinical data  
49 (Galani et al. 2022, Peccia et al. 2020). Recent research has demonstrated a close correlation  
50 between the trends of SARS-CoV-2 abundance in wastewater and clinical data (D'Aoust et al.  
51 2022, Nourbakhsh et al. 2022, Peccia et al. 2020, Pileggi et al. 2022), underscoring the  
52 effectiveness of wastewater surveillance in monitoring SARS-CoV-2.

53 Reverse transcription quantitative PCR (RT-qPCR) has been the workhorse for SARS-CoV-2  
54 wastewater surveillance due to its low cost, high sensitivity, and accuracy. However, the virus  
55 has been mutating since its emergence in late 2019 as indicated in sequences shared on the  
56 publicly available platform GISAID (<https://gisaid.org/>). Some variants are classified as variants  
57 of concern (VOCs) by WHO based on their phenotype and impact on countermeasures. A major  
58 concern for qPCR-based wastewater surveillance is that if mutations occur in any region targeted  
59 by the assay, it might lead to inaccuracies in quantification. The US Centers for Disease Control  
60 (CDC) N1 and N2 assays targeting two subregions of the N gene encoding the nucleocapsid  
61 protein (Lu et al. 2020) are the most widely used targets, because they are less prone to mutations  
62 compared to other regions of the genome, such as the S gene ([3](https://gisaid.org/lineage-</a></p></div><div data-bbox=)

63 comparison/). The CDC assay targets two distinct regions of the virus to provide additional  
64 confidence in the specificity and accuracy of the results. As both targets are to the same gene,  
65 they are expected to be present at a 1:1 ratio. Most of the early VOCs including Alpha, Beta,  
66 Gamma, and Delta variants have no mutations in the CDC N1 or N2 regions. However, Omicron  
67 and its sub-lineages which started circulating worldwide in late December 2021, had several  
68 mutations in the N1 probe binding region while had no mutation reported in primer regions  
69 (Peng et al. 2022). These mutations can be seen in an alignment based on sequences shared on  
70 GISAID (Fig. 1 and Table S2). Notably, the C to T point mutation at position 28311 (C28311T)  
71 of the N1 probe is present in all Omicron sub-lineages. Moreover, additional mutations appeared  
72 in the N1 probe region in certain BA.5 sub-lineages including the A28330G mutation in  
73 BA.5.2/BF.7 strains, and the C28312T mutation in BQ.1/BQ.1.1 strains (Fig. 1). The presence of  
74 these point mutations raised some concerns over the quantification accuracy of qPCR based  
75 WBE, although there is considerable debate as to the impact of such small sequence changes.

76 In our routine SARS-CoV-2 WBE program at the University of Toronto, we noticed a shift in the  
77 ratio of N1 to N2 since the outbreak of Omicron in late 2021 in samples from all Toronto  
78 municipal wastewater treatment plants. This led us to systematically investigate the impact of  
79 mutations in the N1 probe binding region on RT-qPCR quantification. Using weekly wastewater  
80 samples from Toronto Ashbridges Bay (TAB, Toronto Ontario), we measured the abundance of  
81 mutated sequences using an orthologous and previously described liquid chromatography-mass  
82 spectrometry (LC-MS) method and compared this analysis with N1 and N2 quantification based  
83 on RT-qPCR. We also designed four synthetic oligomers representing specific variant strains and  
84 measured the magnitude of their impact in RT-qPCR reactions. These data unequivocally

85 confirm that the observed “N1 drop-out” or discrepancy between N1 and N2 signals in RT-  
86 qPCR-based surveillance was due to strain-dependent mutations in the probe region.

87

## 88 **2. Results and Discussion**

### 89 *2.1. Temporal trends of N1 and N2 concentrations in Toronto wastewaters*

90 SARS-CoV-2 levels in the raw influents from TAB were monitored beginning Feb 11, 2021. As  
91 shown in Fig. 2A, both N1 (blue circles) and N2 (green diamonds) concentrations (copy/mL) in  
92 TAB wastewater fluctuated during the two years, mainly driven by the waves of different SARS-  
93 CoV-2 variants such as B.1.1.7 (Alpha), B.1.617.2 (Delta), and various B.1.1.529 (Omicron) sub-  
94 lineages that circulated in Canada (cov-spectrum.org). N1 and N2 are two biomarkers of SARS-  
95 CoV-2, so they are expected to be present at approximately 1:1 ratio in any sample with a  
96 reasonably intact N gene in the extracted RNA. For RT-qPCR absolute quantification, the  
97 stability of standards during storage and potential human errors in the calibration curve  
98 preparation are common issues that can adversely affect the accuracy of quantification. Since the  
99 same standard, which contained both N1 and N2 gene sequences on the same template string  
100 with 1:1 ratio (N-plasmid or ConcatP), was used for both N1 and N2 quantifications throughout  
101 the two years of surveillance, we expected a consistent N2/N1 ratio in wastewater samples.  
102 Consistent with our expectation, N2/N1 ratios in RT-qPCR were detected close to 1 in TAB  
103 wastewaters during Alpha and Delta waves (Feb 2021 to Dec 2021, Fig. 2C). However, we  
104 started to observe an increase in the N2/N1 ratio when Omicron became dominate after Dec  
105 2021 (Fig. 2C). Since limited mutations in the N2 region were reported (Hasan et al. 2021) or  
106 sequences from GISAID, these results implicated that reported mutations in the N1 region of

107 Omicron variants might be responsible for the underestimation of N1 gene copies in wastewaters  
108 in our RT-qPCR. The mutations in N1 probe region would potentially affect the binding affinity  
109 of the probe to the template, and thus affect N1 quantification in wastewater when using the  
110 wildtype sequence as standard in RT-qPCR.

111 *2.2. Mass Spectrometry (nPCR-LC-MS) to confirm actual proportions of variant N1 sequences*  
112 *present in wastewater samples*

113 To accurately quantify the proportions of different variant N1 sequences in wastewater samples,  
114 we employed a nested PCR-LC-MS method previously developed in our group (Peng et al.  
115 2022). This LC-MS-based method can discriminate single-base mutations that are challenging to  
116 differentiate by allele-specific qPCR methods. By using two sets of nested PCR reactions (primer  
117 sequences shown in Table S3), mutations located at positions 28310-28312 and 28328-28330  
118 within the N1 probe binding region were amplified and analyzed separately by LC-MS. Three  
119 genotypes within the 28310-28312 region could be detected in selected wastewater samples,  
120 which were CCC (wildtype), CTC (universal to all Omicron), and CTT (BQ.1\*)/TTC (BF.10)  
121 (Fig. 2B). Two genotypes in the 28328-28330 region were detected which were GGA (wildtype)  
122 and GGG (BA.5.2\* including BF.7 and BF.10) (Fig. 2B). Some mutations could not be  
123 distinguished by LC-MS, such as the CTT mutation (in BQ.1\*) vs. TTC mutation (in BF.10) in  
124 the 28310-28312 amplicon, because these two mutations share the same  $m/z$  and have similar  
125 retention time in HPLC. However, BQ.1\* variants with the CTT mutation circulated at a much  
126 higher rate than BF.10 with the TTC mutation (Public Health Ontario, 2022). Hence, it was safe  
127 to assume that the detected CTT+TTC mutation would predominantly represent BQ.1\*.

128 To investigate the effects of those mutations on N1 quantification in wastewater, we separated  
129 the 2-year long wastewater surveillance data (Feb 11, 2021 to Dec 28, 2022) into four different

130 periods according to the mutation patterns determined by nPCR-LC-MS (Fig. 2B). In Period I  
131 (Feb 11, 2021-Dec 16, 2021) corresponding to Alpha and Delta waves, no mutation in the N1  
132 probe binding region was detected in wastewater samples. In Period II (Dec 17, 2021 - Jul 31,  
133 2022) when the Omicron BA.1 and BA.2 waves hit Toronto, the C28311T mutation rapidly took  
134 over from the wild type, as revealed by nPCR-LC-MS in our previous study (Peng et al. 2022).  
135 This C28311T mutation has been consistently detected in all wastewater samples since late Dec  
136 2021 as a universal mutation across all Omicron sub-lineages. In Period III (Aug 1, 2022 - Nov  
137 30, 2022), in addition to the C28311T universal Omicron mutation, an additional mutation,  
138 A28330G was also detected in the N1 probe region. The A28330G mutation, with the highest  
139 proportion detected on Oct 16, 2022 ( $77\% \pm 4$ , Fig. 2B), was a signature for variant BA.5.2 sub-  
140 lineages including BF.7 and BF.10. In Period IV (Dec 1, 2022 - Dec 28, 2022) corresponding to  
141 the wave of BQ.1/BQ.1.1, another second additional mutation, C28312T in the N1 probe region,  
142 was simultaneously detected in Toronto wastewaters, with the highest proportion ( $48\% \pm 1$ )  
143 detected on Dec 26, 2022. Collectively, the nPCR-LC-MS clearly demonstrated the shift of N1  
144 mutation patterns in TAB wastewaters across four time periods corresponding to the occurrence  
145 of different variant waves, as shown in Fig. 2.

### 146 *2.3. The shift in N2/N1 ratios is associated with N1 mutation patterns in wastewaters.*

147 To investigate the potential relationship between the N2 and N1 discrepancy and N1 mutation  
148 patterns, we calculated N2/N1 ratio in wastewaters across the four different periods defined by  
149 the mutation patterns confirmed by the nPCR-LC-MS analysis. Recall that the quantified N1 RT-  
150 qPCR amplification products were used for the nested-PCR and following LC-MS analysis,  
151 thereby eliminating errors introduced in subsampling, and thus ensuring more accurate and  
152 precise data to investigate relationships between mutations and RT-qPCR quantifications.

153 As plotted in Fig. 2C, the N2/N1 ratios varied systematically in the different time periods (I-IV)  
154 defined by proportions of mutations. In Period I (yellow region), the N2/N1 ratio was close to the  
155 expected value of 1, varied slightly when overall signal strength was very low. There was a very  
156 noticeable increase in the N2/N1 ratio at the onset of Period II (green region) corresponding to  
157 the single universal Omicron mutation C28311T, and the ratio remained elevated through Period  
158 III (blue region) when the second mutation A28330G occurred. In Period IV (purple region), the  
159 A28330G mutation located 18 bases away at the probe 3' end from the universal Omicron  
160 mutation (C28311T) diminished and an alternate second mutation C28312T next to the universal  
161 Omicron mutation closer to the probe 5' end started to increase, when N2/N1 ratios recovered a  
162 little (Fig. 2C).

163 The overall average N2/N1 ratios were calculated for each period (Fig. 3), clearly showing these  
164 differences between periods. The N2/N1 ratios in Period IV (mean =  $1.54 \pm 0.35$ ,  $n = 31$ ) with  
165 both C28311T and C28312T mutations were significantly higher than those in Period I (mean =  
166  $0.84 \pm 0.44$ ,  $n = 275$ ) with no mutation, but not statistically different than Period II (mean =  $1.42$   
167  $\pm 0.35$ ,  $n = 182$ ) with just the Omicron mutation C28311T ( $p = 0.16$ ), suggesting that the  
168 secondary mutation C28312T (in addition to C28111T) at the probe 5' end did not have a large  
169 impact on quantification beyond regular Omicron strains. However, in Period III when the  
170 second mutation A28330G close to the probe 3' end occurred, the mean ratio ( $1.73 \pm 0.33$ ,  $n =$   
171  $82$ ) was significantly higher than Period II and Period IV, indicating the importance of mutation  
172 at the probe 3' end, together with Omicron universal C28311T, on accuracy of quantification. A  
173 similar N1 "dropout" pattern corresponding to various VOC waves was also observed in the  
174 surveillance data from fourteen other labs who have been monitoring SARS-CoV-2 level in  
175 wastewater in Ontario (Thakali et al. 2023). All these results clearly demonstrated the link



176 between the observed N2/N1 discrepancy and N1 mutation pattern. Nevertheless, wastewater  
177 often contained multiple strains of SARS-CoV-2 with a mixture of mutations in the N1 probe  
178 region, making it difficult to directly prove the impact of mutation in N1 probe region on N1 RT-  
179 qPCR quantification. Therefore, we proceeded to directly measure the impact of these single or  
180 double mutations on qPCR quantification by individual DNA oligomers representing these  
181 mutations.

182 *2.4. Using oligomers containing the signature mutations to confirm underestimation of N1 in*  
183 *qPCR.*

184 To further confirm the effect of specific mutations on N1 qPCR quantification, we designed four  
185 DNA oligomers which included both the N1 and N2 gene regions (Table S1). Since there was no  
186 mutation in the primer binding regions of the CDC N1 and N2 assays, the cDNA synthesis in the  
187 reverse transcription step of the mutated strains should not be impacted. Therefore, the  
188 underestimation must be associated with the PCR stage, and thus using DNA-based oligomers  
189 would mimic that impact. In our design, while the N2 region was identical to the wildtype  
190 sequence, the N1 region in these oligomers varied to represent different mutations as shown in  
191 Fig. 1 and Table S1. Since these oligomers all shared the same N2 sequence, the CDC N2 qPCR  
192 assay calibrated with the wild type ConcatP standard (Fig. S1) was used to quantify the  
193 concentrations of these oligomers. The same batch of serially diluted oligomers from N2 assay  
194 was used as the template for CDC N1 qPCR assay to examine the impact of the mutations on N1  
195 quantification. All N1 and N2 reactions were conducted on the same PCR plate to minimize  
196 error.

197 The true concentrations of the oligomers calibrated by N2 qPCR standard curve were compared  
198 to the estimations based on N1 qPCR using ConcatP as standard (Fig. 4). Delayed Ct values were

199 observed in N1 variant oligomers, and the resulting concentrations determined using the wild  
200 type (ConcatP) standard curve are therefore lower. As shown in Fig. 4, the estimated N1  
201 concentrations of the oligomers with mutations (i.e., Omicron, BQ.1\*, BA.5.2 and BF.10) were  
202 all lower compared to the true concentrations. In general, for the serially diluted standards, the  
203 N1 quantifications for oligomer representing general Omicron with single mutation by ConcatP  
204 standard curve were 1.53-fold lower than true value. The N1 quantification for oligomer  
205 corresponding to BA.5.2 with two mutations including one at the probe 3' end had the most  
206 effect which were 2.28-fold lower than true value, following BF.10 corresponded three mutations  
207 with 2.18-fold lower than true value, and BQ.1\* corresponded two mutations with 1.65-fold  
208 lower than true value.

209 The oligomer experiments also revealed that the largest deviation occurred with the oligo  
210 containing both C28311T and A28330G mutations, consistent with the largest discrepancy  
211 between N2 and N1 observed in TAB wastewater during the BA.5.2 wave. The close  
212 quantifications between BQ.1 oligomer and Omicron universal oligomer also match the  
213 wastewater results where no significance was observed between period II and IV. Therefore, the  
214 oligomer experiments and the shifts in the ratio of N2/N1 in the monitored TAB wastewaters,  
215 along with the proportions of mutations in the actual TAB samples inferred by LC-MS, confirm  
216 that the mutation in the N1 probe region was directly associated with the underestimation of the  
217 N1 quantification in RT-qPCR when using the wildtype sequence for calibration.

### 218 *2.5. Implications for utility of the CDC N1 RT-qPCR assay*

219 The effect of primer/probe-template mismatch on quantification in qPCR has been investigated  
220 in other targets for SARS-CoV-2 (Bozidis et al. 2022, Hasan et al. 2021). Especially, mutation in  
221 the probe binding region was found to largely impact qPCR amplification by delaying

222 amplification or causing failure, which were also used to design mutation/variant detection  
223 methods such as the N200 assays to quantify Delta/Omicron/Universal SARS2 (Fuzzen et al.  
224 2023), the D3L1 assay to detect Alpha variant (Graber et al. 2021), and the various assays  
225 targeting the S gene to measure Alpha/Beta/Gamma variants (Liu et al. 2023, Peterson et al.  
226 2022, Vega-Magaña et al. 2021). N gene dropout or failure was also reported using some  
227 commercial SARS2 RT-qPCR kits when mutations were found in the N200 region (28881-  
228 28883, 28896-28898, in B.1.1.318 variant) by sequencing (Bozidis et al. 2022). Our study also  
229 demonstrated that both the number of mutation (e.g., 0 vs. 1 mutation vs. 2 mutations) and the  
230 mutation position on the probe binding region (e.g., the second mutation on the probe 3' end vs.  
231 5' end) influence the amplification of the N1 target, and thus affected the degree of  
232 underestimation when using the wildtype N1 sequence as calibration standards.

233 Although there were up to three mismatches between the CDC N1 probe and the Omicron strains  
234 that we examined in this study, all templates were still amplified. The problem with the N1  
235 underestimation with these mutated strains was that the standardized materials used in our  
236 routine analysis contained the wildtype sequence that didn't have the delayed amplification as  
237 the mutated strains. In other words, the amplification behavior in our standardized materials was  
238 not comparable to the actual TAB wastewater samples or oligomers with mutations. When we  
239 ran serial dilutions of the N1 variant oligomers and ConcatP in the CDC N1 qPCR, we still  
240 achieved relatively good amplification efficiency (97.9-102.2%) for the standard curves although  
241 the y-intercepts were delayed in the oligomers with mutations (Fig. S1).

242 Given that the templates could still be amplified in the CDC N1 qPCR reaction despite the  
243 mismatches, there are multiple ways to tune the assay to achieve more accurate N1  
244 quantification. One adjustment would be to switch to a different standardized material to better

245 represent the N1 probe region mutation profile in the actual wastewater samples. When changing  
246 to use the oligomer representing the dominant mutation type in each period as qPCR standards  
247 instead of using the wildtype ConcatP, an N2/N1 ratio was closer to 1 with the newly calibrated  
248 N1 concentrations (Fig. S2). Previously this was difficult to execute with multiple strains co-  
249 existing in wastewaters with different mutation types. It might be feasible now, as XBB has been  
250 the sole main type of SARS-COV-2 variant (Public Health Ontario, 2023) since early 2023 and  
251 all sub-lineages of XBB only have the C28311T mutation in the N1 probe region. Another  
252 modification to improve the CDC N1 qPCR assay was to run the N1 assay at a lower annealing  
253 temperature to reduce the thermal barrier of probe-template binding and minimize Ct delay. A  
254 third option is to redesign the N1 probe to bind to a more conserved region within the N1 gene,  
255 or switch to a different assay target that is less prompt to mutation such as the N200 (Fuzzen et  
256 al. 2023).

257 Another approach to increase the N1 CDC assay accuracy is to switch from qPCR platform to  
258 digital PCR platform. Digital PCR does not rely on amplification curves, i.e, quantification only  
259 depends on the positive and negative partition counts at the end of the run instead of relying on  
260 amplification behavior and dynamic. Since all mutated strains are still amplifiable in the N1  
261 CDC PCR reaction, mutation only changes the fluorescent amplitude but not the positive vs.  
262 negative partition counts (Fig. S3, Table S5). As proof of concept, we selected two TAB samples  
263 at different dates to represent each period and conducted CDC N1 reaction on RT-dPCR. The  
264 N2/N1 ratios from RT-dPCR were all close to 1 (ranged from 0.8 to 1.14) in samples from all  
265 different periods (Table S6). Therefore, switching to dPCR may be one option for accurate  
266 quantification of SARS-CoV-2 in wastewater in the future, although a cost/benefit analysis

267 would be required, as dPCR is currently quite a bit more expensive per sample (approximately  
268 CAD \$4 per RT-qPCR single-plex reaction, while CAD \$12 per RT-dPCR single-plex reaction).

269

### 270 **3. Materials and Method**

#### 271 *3.1. Samples and Reagents.*

272 Ashbridges Bay (TAB) wastewater treatment plant is Canada's biggest wastewater treatment  
273 plant serving over 1.5 million people (Pileggi et al. 2022). Post-grit composite influent samples  
274 (24-hour) from TAB were collected three to five times per week since Feb 11, 2021 (Peng et al.  
275 2022, Pileggi et al. 2022). 500 mL – 1 L subsamples were collected onsite and were stored at  
276 4 °C and shipped as soon as possible, typically on the same day, to the laboratory at the  
277 University of Toronto in a cooler on ice.

278 All plasticware (tips, tubes, plates, etc.) used in extraction and PCR were DNase- and RNase-  
279 free. Probes for N1 (cat. 10006832) and N2 (cat. 10006835) were purchased from Integrated  
280 DNA Technologies (IDT). Two PCR standards were purchased: the N-plasmid control from IDT  
281 (10006625) and an in-house designed concatenated plasmid (ConcatP, GenBank accession  
282 number OR994921) purchased from Twist, both contain the complete wild-type sequence  
283 spanning the N1 and N2 regions. Four N1 variant oligomers were designed based on the  
284 consensus N1 sequences of each group of BA.1, BQ.1, BF.7 and BF.10 randomly selected from  
285 the corresponding lineage in the GISAID database. Each N1 variant oligomer contained the CDC  
286 N1 region of the corresponding variant group with their specific mutation(s) as well as the  
287 original wild type CDC N2 region. All the four N1 variant oligomers (177 bp) were then  
288 purchased from Eurofins; exact sequences are provided in Table S1. Other primers and shorter

289 oligomer standards (<40 bp) required for LC-MS were purchased from Invitrogen, Thermo  
290 Fisher Scientific; their sequences are provided in Tables S3 and S4). Methanol was purchased  
291 from Thermo Fisher Scientific. Triethylamine (TEA, 471283) and hexafluoroisopropanol (HFIP,  
292 105228) were obtained from Sigma-Aldrich. Unless otherwise specified, all other reagents were  
293 analytical grade.

294

### 295 *3.2. Viral RNA extraction from wastewaters.*

296 TAB wastewater samples (500 mL - 1 L) were shipped to the lab three times per week and RNA  
297 extraction started immediately upon sample arrival. After being well mixed, 80 mL were sub-  
298 sampled from the original shipment bottle and split into two 50 mL falcon centrifuge tubes  
299 (40mL each). After centrifugation at  $10,000 \times g$  for 45 minutes at  $4^{\circ}\text{C}$ , pellets from the two  
300 Falcon tubes were resuspended with 1 - 2 mL remaining wastewater and transferred to a single 2  
301 mL microcentrifuge tube. The pooled wet pellet was centrifuged at  $13,000 \times g$  for one minute  
302 and the supernatant was removed. The pellet wet mass was recorded. RNA was extracted from  
303 the pooled pellet using Qiagen's RNeasy PowerMicrobiome Kit (Qiagen, Germantown, MD),  
304 with 10  $\mu\text{L}$  beta-mercaptoethanol (Bioshop, MER002) and 100  $\mu\text{L}$  phenol: chloroform: isoamyl  
305 alcohol (25: 24: 1, v/v) solutions (Invitrogen, CAT# 15593031, USA) added to the bead beating  
306 tube along with the lysis buffer from the kit. DNase step was skipped. All RNA extracts were  
307 eluted in a volume of 100  $\mu\text{L}$ . A whole-process-control was included in each batch of extractions  
308 that contained all the same components except the sample.

309

### 310 *3.3. Reverse transcriptase qPCR and digital PCR assays for N1 and N2.*

311 The published CDC assays (Lu et al. 2020), targeting at N1 and N2 gene regions, were used for  
312 the routine quantification of the SARS-CoV-2 viral signal in wastewaters. In brief, each RT-  
313 qPCR reaction contained 2.5  $\mu$ L  $4 \times$  TaqMan Fast Virus 1-Step Master Mix (CAT# 4444436,  
314 ThermoFisher Scientific), 125 nM probe and 500 nM each of forward and reverse primers, 4  $\mu$ L  
315 of RNA sample or standard and water to a final reaction volume of 10  $\mu$ L. Bio-Rad CFX Opus  
316 384 Real-Time PCR System was applied for all RT-qPCR assays. For routine wastewater qPCR  
317 analyses, the linearized N-plasmid (from Feb 11, 2021 to Aug 08, 2021) or the linearized  
318 ConcatP (from Aug 09, 2021 to Dec 29, 2022) were used as standards. Calibration curves for  
319 both N1 and N2 were included on each plate. All standards for RT-qPCR, including IDT N-  
320 plasmid, ConcatP and the four variant N1 oligomers, were diluted in a polyA-TE (Tris and  
321 EDTA) carrier matrix as described SI.

322 RT-digital PCR (RT-dPCR) was performed in 40- $\mu$ L reaction mixtures using the QIAcuity  
323 OneStep Advanced probe Kit (Cat No. 250132) (Ahmed et al. 2022). Each RT-dPCR reaction  
324 contained 10  $\mu$ L of 4x Probe Master Mix, 0.4  $\mu$ L 100x RT Mix, 0.4  $\mu$ M each of forward and  
325 reverse primers, 0.2  $\mu$ M probe, 5  $\mu$ L of template RNA and PCR-grade water to a final volume of  
326 40  $\mu$ L. The reactions were prepared in 200  $\mu$ L PCR tubes, and then loaded on to 26K 24-wells  
327 (QIAGEN) after well mix. The Nanoplate was then loaded onto the QIAcuity dPCR 5-plex  
328 platform (Qiagen) and subjected to a workflow that included: (i) a priming step to create the  
329 nano-size partitions; (ii) an amplification/thermocycling step (RT at 50°C for 30 min, initial  
330 denaturation at 95°C for 2 minutes, and 45 cycles of 5 second at 95 °C and 30 second at 60°C);  
331 and (iii) a final imaging step in the FAM channel. A no-template control and a positive control  
332 were also included in each RT-dPCR run. Data were analyzed using the QIAcuity Suite Software  
333 V2.1.8.23 (Qiagen, Germany). Threshold lines to separate the positive and negative partitions

334 were set manually to be consistent among the reactions on the same plate, and the quantities  
335 exported as gene copies/ $\mu\text{L}$  of reaction (Table S5).

336 All RNA extracts were run in technical triplicates for RT-qPCR and technical duplicates for RT-  
337 dPCR. The limit of detection (LOD) for qPCR was defined at a theoretical lowest number (1  
338 copy) in each reaction (0.31 copies per mL of wastewater). The limit of quantification (LOQ) of  
339 RT-qPCR was set at the lowest concentration of standard curves which was 3.9 copies per  
340 reaction (1.25 copies per mL of wastewater) for both N1 and N2. The quantification for low  
341 template concentration is not reliable, and in this study, all results with copies per reaction lower  
342 than half of LOD were replaced with 0.5 copies/reaction (0.16 copies per mL of wastewater).  
343 The LOD for RT-dPCR was approximately 2 copies per reaction (i.e.,  $\sim 0.05$  copies per  $\mu\text{L}$   
344 reaction).

#### 345 *3.4. nPCR-LC-MS Method.*

346 The nested polymerase chain reaction and liquid chromatography-mass spectrometry (nPCR-LC-  
347 MS) method developed and reported previously (Peng et al. 2022), with modification, was  
348 employed to detect and quantify mutations in wastewater samples. In brief, the resulting DNA  
349 products amplified in the CDC-N1 RT-qPCR assay were diluted 100-fold in water and used as  
350 templates for nested PCR. This procedure ensured that the proportions of mutation(s) measured  
351 by LC-MS were from the same RNA template as quantified by qPCR. While the nested PCR  
352 (nPCR) primers for the amplification of 28310 – 28312 region were the same as reported (Peng  
353 et al. 2022), another pair of nPCR primers were designed for the amplification of 28328 – 28330  
354 region in this study (Table S3 and Table S4). Chromatograms for 28310 – 28312 regions from  
355 samples and standards were shown in Fig. S4. The final nested PCR product (50  $\mu\text{L}$ ) was  
356 digested with sequencing grade trypsin (V5113, Promega) overnight, and then precipitated by



357 adding ethanol to 70% and stored at -80°C for 1 hour. After centrifuge at 4 °C for 30 min, the  
358 supernatant was removed and the pelleted DNA was re-dissolved in water. Subsequently, it was  
359 transferred to a 96-well plate for sample loading by the Vanquish UPLC system (Thermo  
360 Scientific). The separation was conducted in a ACQUITY UPLC Oligonucleotide BEH C18  
361 Column (130Å, 1.7 µm, 2.1 mm X 50 mm, Waters, SKU: 186003949) with mobile phase A  
362 (water with 15 mM TEA and 25 mM HFIP) and mobile phase B (methanol) at a flow rate 0.2  
363 mL/min with a gradient elution starting at 5% B for 2 min, then increasing from 5 to 30% B over  
364 7 min, and then increasing to 99% B over 6.5 min. Finally, the eluent was returned to 5% B in  
365 0.5 min, and held at 5% B for 2 min prior to next run. The molecular identification was  
366 performed on a Q-Exactive orbitrap. A spray voltage of 3.0 kV and an ion transfer tube  
367 temperature of 300 °C were used for ionization and desolvation. Precursor spectra were acquired  
368 from m/z 1000 to 5000 in negative ionization mode at a resolution of 140,000.

369 More details about RNA extraction, nPCR and RT-qPCR are provided in SI.

370

### 371 *3.5. Data analysis.*

372 The N2/N1 ratio for each sample was calculated using the average of the technical triplicate  
373 quantifications in RT-qPCR. A fourteen-day moving average of the N2/N1 ratio was calculated  
374 and plotted using Microsoft excel software. Since results with lower than half of RT-qPCR LOD  
375 were replaced with 0.5 copies/reaction for both N1 and N2, samples where 2 or 3 of the technical  
376 triplicates equal to 0.5 copies/reaction were excluded in the N2/N1 ratio trend analysis to ensure  
377 that only data with high quantification certainty were included in our study. The proportion of  
378 each mutation was calculated as the abundance of the target mutation divided by the sum of the

379 abundance of all genotypes detected in the nPCR amplification product. The cut-off dates for  
380 each period were defined as the earliest date when the proportion of the dominant mutation  
381 reached half of its highest observed proportion at our monitored site (i.e., TAB). The significance  
382 of the differences of N2/N1 ratios among the 4 periods were analyzed using the Willcox test.

383

### 384 **Supporting Information Available**

385 The supporting information provides tables and figures addressing: (1) Detailed information for  
386 RNA extraction and RT-qPCR, Mass Spectrometry detection of mutations in wastewater, and  
387 preparation of DNA oligomers with variant N1 sequences; (2) tables for sequences of N1-N2  
388 DNA oligomers, GISAID numbers for N1 sequence alignment, sequences of primers and probes  
389 used in this study, sequences and *m/z* for short oligomers, and MIQE check lists for qPCR and  
390 dPCR; (3) figures for N1 and N2 standard curves, N2/N1 ratio when N1 calibrated by standard  
391 curves with corresponding mutations, N2/N1 ratio comparison analyzed by qPCR and dPCR, and  
392 chromatograms of sense (SS) and anti-sense strands (AS) of nPCR amplicons containing  
393 A28330G region or oligonucleotide standards.

394

### 395 **Acknowledgements**

396 This research was supported by the Ontario Wastewater Surveillance Initiative, and the Natural  
397 Sciences and Engineering Research Council (NSERC) Alliance Grant (ALLRP 576140). The  
398 authors acknowledge the support of instrumentation grants from the Canada Foundation for  
399 Innovation and the Ontario Research Fund.

#### 400 4. References

- 401 Ahmed, W., Bivins, A., Metcalfe, S., Smith, W.J., Verbyla, M.E., Symonds, E.M. and Simpson,  
402 S.L., 2022. Evaluation of process limit of detection and quantification variation of SARS-  
403 CoV-2 RT-qPCR and RT-dPCR assays for wastewater surveillance. *Water research* 213,  
404 118132.
- 405 Bozidis, P., Tsaousi, E.T., Kostoulas, C., Sakaloglou, P., Gouni, A., Koumpouli, D., Sakkas, H.,  
406 Georgiou, I. and Gartzonika, K., 2022. Unusual N gene dropout and Ct value shift in  
407 commercial multiplex PCR assays caused by mutated SARS-CoV-2 strain. *Diagnostics*  
408 12(4), 973.
- 409 D'Aoust, P.M., Tian, X., Towhid, S.T., Xiao, A., Mercier, E., Hegazy, N., Jia, J.-J., Wan, S.,  
410 Kabir, M.P. and Fang, W., 2022. Wastewater to clinical case (WC) ratio of COVID-19  
411 identifies insufficient clinical testing, onset of new variants of concern and population  
412 immunity in urban communities. *Science of the Total Environment* 853, 158547.
- 413 Fuzzen, M., Harper, N.B., Dhiyebi, H.A., Srikanthan, N., Hayat, S., Bragg, L.M., Peterson, S.W.,  
414 Yang, I., Sun, J. and Edwards, E.A., 2023. An improved method for determining frequency  
415 of multiple variants of SARS-CoV-2 in wastewater using qPCR assays. *Science of the Total*  
416 *Environment* 881, 163292.
- 417 Galani, A., Aalizadeh, R., Kostakis, M., Markou, A., Alygizakis, N., Lytras, T., Adamopoulos,  
418 P.G., Peccia, J., Thompson, D.C. and Kontou, A., 2022. SARS-CoV-2 wastewater  
419 surveillance data can predict hospitalizations and ICU admissions. *Science of the Total*  
420 *Environment* 804, 150151.
- 421 Government-of-Canada, 2023. COVID-19 epidemiology update: Current situation - Canada.ca.  
422 <https://health-infobase.canada.ca/covid-19/current-situation.html>.
- 423 Graber, T.E., Mercier, É., Bhatnagar, K., Fuzzen, M., D'Aoust, P.M., Hoang, H.-D., Tian, X.,  
424 Towhid, S.T., Plaza-Diaz, J. and Eid, W., 2021. Near real-time determination of B. 1.1. 7 in  
425 proportion to total SARS-CoV-2 viral load in wastewater using an allele-specific primer  
426 extension PCR strategy. *Water research* 205, 117681.
- 427 Hasan, M.R., Sundararaju, S., Manickam, C., Mirza, F., Al-Hail, H., Lorenz, S. and Tang, P.,  
428 2021. A novel point mutation in the N gene of SARS-CoV-2 may affect the detection of the  
429 virus by reverse transcription-quantitative PCR. *Journal of Clinical Microbiology* 59(4),  
430 10.1128/jcm. 03278-03220.
- 431 Kirby, A.E., Walters, M.S., Jennings, W.C., Fugitt, R., LaCross, N., Mattioli, M., Marsh, Z.A.,  
432 Roberts, V.A., Mercante, J.W. and Yoder, J., 2021. Using wastewater surveillance data to  
433 support the COVID-19 response—United States, 2020–2021. *Morbidity and Mortality*  
434 *Weekly Report* 70(36), 1242.
- 435 Liu, Y., Kumblathan, T., Joyce, M.A., Tyrrell, D.L., Tipples, G., Pang, X., Li, X.-F. and Le, X.C.,  
436 2023. Multiplex Assays Enable Simultaneous Detection and Identification of SARS-CoV-2  
437 Variants of Concern in Clinical and Wastewater Samples. *ACS Measurement Science Au*.
- 438 Lu, X., Wang, L., Sakthivel, S.K., Whitaker, B., Murray, J., Kamili, S., Lynch, B., Malapati, L.,  
439 Burke, S.A. and Harcourt, J., 2020. US CDC real-time reverse transcription PCR panel for  
440 detection of severe acute respiratory syndrome coronavirus 2. *Emerging Infectious Diseases*  
441 26(8), 1654.
- 442 Nourbakhsh, S., Fazil, A., Li, M., Mangat, C.S., Peterson, S.W., Daigle, J., Langner, S.,  
443 Shurgold, J., D'Aoust, P. and Delatolla, R., 2022. A wastewater-based epidemic model for  
444 SARS-CoV-2 with application to three Canadian cities. *Epidemics* 39, 100560.

445 Peccia, J., Zulli, A., Brackney, D.E., Grubaugh, N.D., Kaplan, E.H., Casanovas-Massana, A., Ko,  
446 A.I., Malik, A.A., Wang, D. and Wang, M., 2020. Measurement of SARS-CoV-2 RNA in  
447 wastewater tracks community infection dynamics. *Nature Biotechnology* 38(10), 1164-1167.

448 Peng, J., Sun, J., Yang, M.I., Gibson, R.M., Arts, E.J., Olabode, A.S., Poon, A.F., Wang, X.,  
449 Wheeler, A.R. and Edwards, E.A., 2022. Early warning measurement of SARS-CoV-2  
450 variants of concern in wastewaters by mass spectrometry. *Environmental Science &*  
451 *Technology Letters* 9(7), 638-644.

452 Peterson, S.W., Lidder, R., Daigle, J., Wonitowy, Q., Dueck, C., Nagasawa, A., Mulvey, M.R.  
453 and Mangat, C.S., 2022. RT-qPCR detection of SARS-CoV-2 mutations S 69–70 del, S  
454 N501Y and N D3L associated with variants of concern in Canadian wastewater samples.  
455 *Science of the Total Environment* 810, 151283.

456 Pileggi, V., Shurgold, J., Sun, J.S., Yang, M.I., Edwards, E.A., Peng, H., Tehrani, A., Gilbride, K.,  
457 Oswald, C.J. and Wijayasri, S., 2022. Quantitative trend analysis of SARS-CoV-2 RNA in  
458 municipal wastewater exemplified with sewershed-specific COVID-19 clinical case counts.  
459 *Acs Es&T Water* 2(11), 2070-2083.

460 Public Health Ontario, 2022. Risk Assessment for Omicron Sub-lineage BQ.1 and its Sub-  
461 lineages (BQ.1\*) (as of November 30, 2022), [https://www.publichealthontario.ca/-](https://www.publichealthontario.ca/-/media/Documents/nCoV/voc/2022/12/omicron-bq1-bq11-dec-07.pdf?rev=53f4b02acf09410b86b6a9385cebcf8a&sc_lang=en)  
462 [/media/Documents/nCoV/voc/2022/12/omicron-bq1-bq11-dec-](https://www.publichealthontario.ca/-/media/Documents/nCoV/voc/2022/12/omicron-bq1-bq11-dec-07.pdf?rev=53f4b02acf09410b86b6a9385cebcf8a&sc_lang=en)  
463 [07.pdf?rev=53f4b02acf09410b86b6a9385cebcf8a&sc\\_lang=en](https://www.publichealthontario.ca/-/media/Documents/nCoV/voc/2022/12/omicron-bq1-bq11-dec-07.pdf?rev=53f4b02acf09410b86b6a9385cebcf8a&sc_lang=en).

464 Public Health Ontario, 2023. Risk Assessment for Omicron Sub-lineage XBB\* (including XBB.1  
465 and XBB.1.5) (as of January 25, 2023), [https://www.publichealthontario.ca/-](https://www.publichealthontario.ca/-/media/Documents/nCoV/voc/2023/02/risk-assessment-omicron-sub-lineage-xbb1-xbb15-feb-02.pdf?rev=17a41da58aea4d4989ef90cacfd5348a&sc_lang=en)  
466 [/media/Documents/nCoV/voc/2023/02/risk-assessment-omicron-sub-lineage-xbb1-xbb15-](https://www.publichealthontario.ca/-/media/Documents/nCoV/voc/2023/02/risk-assessment-omicron-sub-lineage-xbb1-xbb15-feb-02.pdf?rev=17a41da58aea4d4989ef90cacfd5348a&sc_lang=en)  
467 [feb-02.pdf?rev=17a41da58aea4d4989ef90cacfd5348a&sc\\_lang=en](https://www.publichealthontario.ca/-/media/Documents/nCoV/voc/2023/02/risk-assessment-omicron-sub-lineage-xbb1-xbb15-feb-02.pdf?rev=17a41da58aea4d4989ef90cacfd5348a&sc_lang=en).

468 Thakali, O., Mercier, É., Eid, W., Brassat-Gorny, J., Overton, A.K., Knapp, J.J., Manuel, D.,  
469 Charles, T., Goodridge, L. and Arts, E.J., 2023. A Dual Loci Quality Assurance and Control  
470 Framework for Real-Time Evaluation of Signal Accuracy in Wastewater Surveillance of  
471 Pathogens with High Rates of Mutation, preprint.

472 Vega-Magaña, N., Sánchez-Sánchez, R., Hernández-Bello, J., Venancio-Landeros, A.A., Peña-  
473 Rodríguez, M., Vega-Zepeda, R.A., Galindo-Ornelas, B., Díaz-Sánchez, M., García-  
474 Chagollán, M. and Macedo-Ojeda, G., 2021. RT-qPCR assays for rapid detection of the  
475 N501Y, 69-70del, K417N, and E484K SARS-CoV-2 mutations: a screening strategy to  
476 identify variants with clinical impact. *Frontiers in Cellular and Infection Microbiology* 11,  
477 672562.

478 Zheng, X., Deng, Y., Xu, X., Li, S., Zhang, Y., Ding, J., On, H.Y., Lai, J.C., Yau, C.I. and Chin,  
479 A.W., 2022. Comparison of virus concentration methods and RNA extraction methods for  
480 SARS-CoV-2 wastewater surveillance. *Science of the Total Environment* 824, 153687.

481

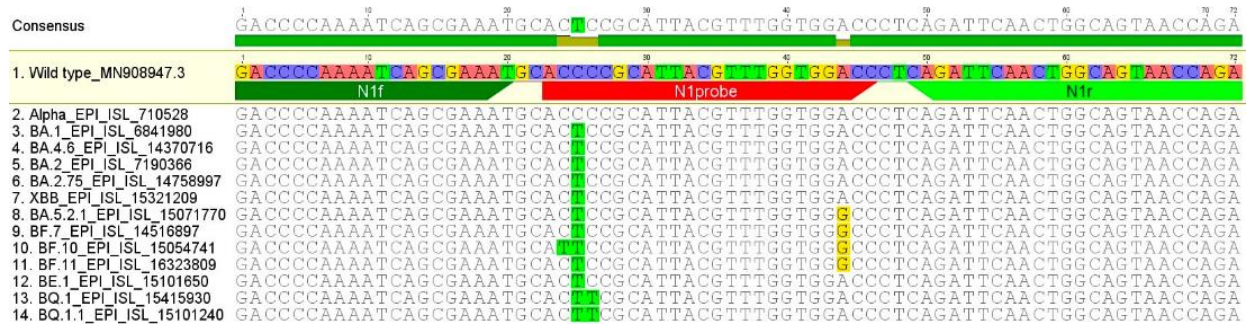

482

483 Fig. 1. Alignment of CDC N1 assay region with sequences reported in Omicron variants.

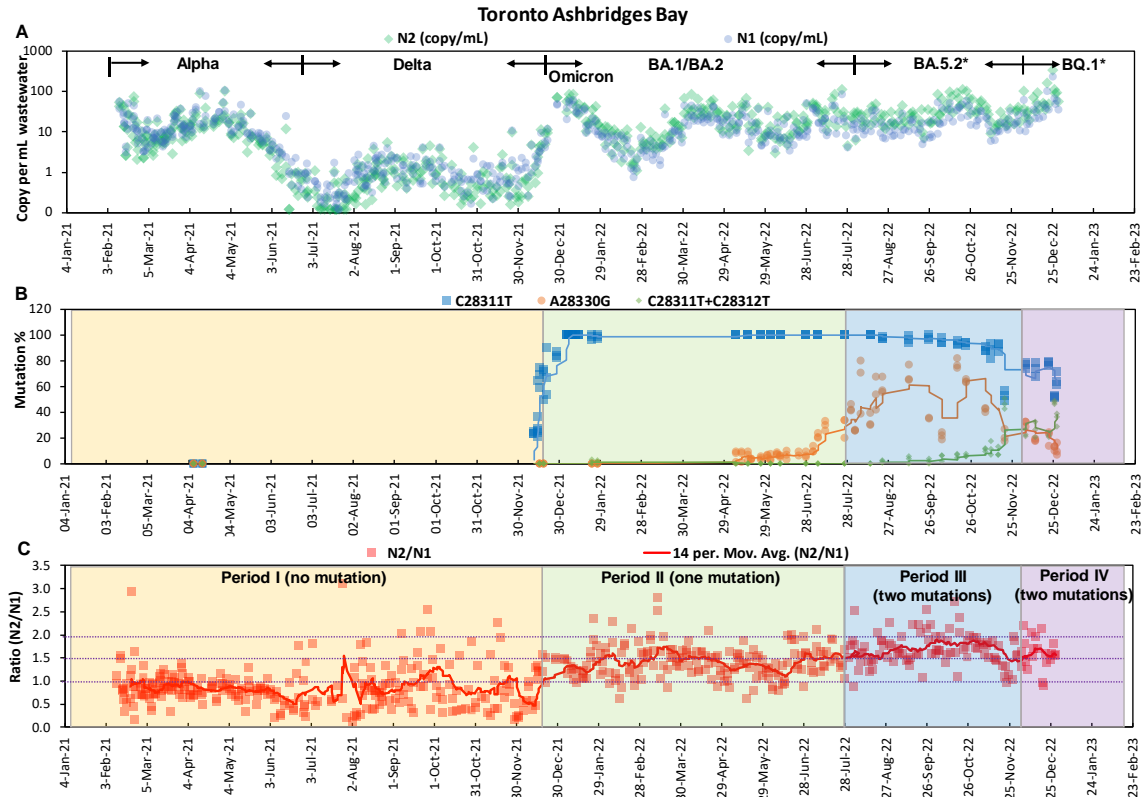

484 Fig. 2. Trends of N1 (green dots) and N2 concentrations (blue dots) (copies/mL wastewater) (A),  
 485 all different mutation patterns in N1 probe region (B), and N2/N1 ratios with 14-day moving  
 486 average (C) in TAB wastewater. The proportions for C28311T in Fig. 2B during Dec 12, 2021 to  
 487 Jan 27, 2022 were from our previous paper (Peng et al. 2022). Proportions of each mutation  
 488 analyzed by LC-MS in Fig. 2B were nPCR products amplified from N1 in Fig. 2A. Background  
 489 colors in Fig. 2B and 2C indicated different periods, which were separated based on mutation  
 490 patterns in Fig. 2B.

492

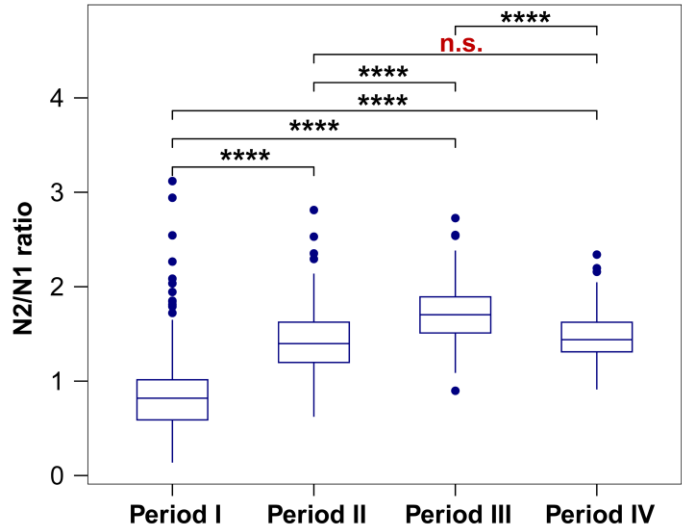

493

494 Fig. 3. Differences of mean N2/N1 ratios among the four periods. The differences were very  
 495 significant (\*\*\*\*,  $p < 0.0001$ ) when tested by Wilcoxon among periods I, II, III, and IV, except not  
 496 significant (n.s.,  $p = 0.16$ ) between period II and IV.

497

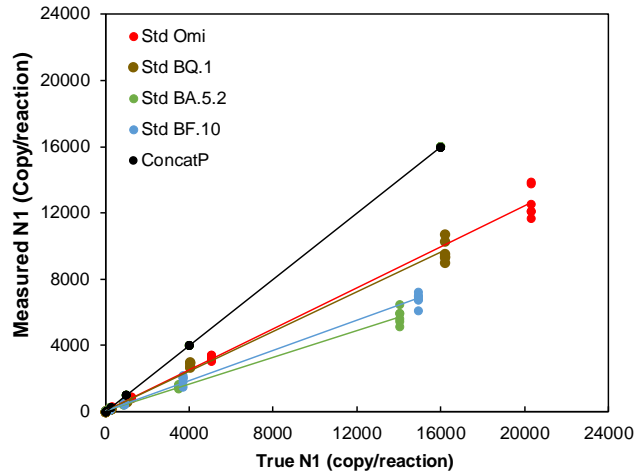

498

499 Fig. 4. Measured vs true N1 copies per reaction as a function of sequence. True concentrations  
 500 of each oligomer (measured via the N2 reaction) are plotted on the X-axis versus their  
 501 corresponding measured value on the Y-axis calibrated using the wildtype sequence (ConcatP) as  
 502 standard. Black line shows wild type quantification and a perfect match between measured and  
 503 true values. For all targets with mutations, quantification is underestimated, which is especially  
 504 pronounced for BA.5.2 (green) and BF.10 (blue) where the measured value is about half the true  
 505 value. The measured values for BQ.1 (brown), and all Omicron (red) are about 25% depressed.

506
